# Supplementary material for: A convenient detection system consisting of efficient Au@PtRu nanozymes and alcohol oxidase for highly sensitive alcohol biosensing
Source: Royal Society of Chemistry journal article supplement (doi:10.1039/d0na00002g), 2020-01-01
Supplement: d0na00002g1.pdf [file d0na00002g1.pdf]

## Supporting Information

### A Convenient Detection System Consisting of Efficient Au@PtRu Nanozymes and Alcohol Oxidase for Highly Sensitive Alcohol Biosensing

Feng Lv<sup>a</sup>, Yuzhu Gong<sup>a</sup>, Yingying Cao<sup>a</sup>, Yaoyao Deng<sup>b</sup>, Shufeng Liang<sup>c,d</sup>, Xin Tian<sup>e,\*</sup>, Hongwei Gu<sup>a,\*</sup>,  
and Jun-Jie Yin<sup>e</sup>

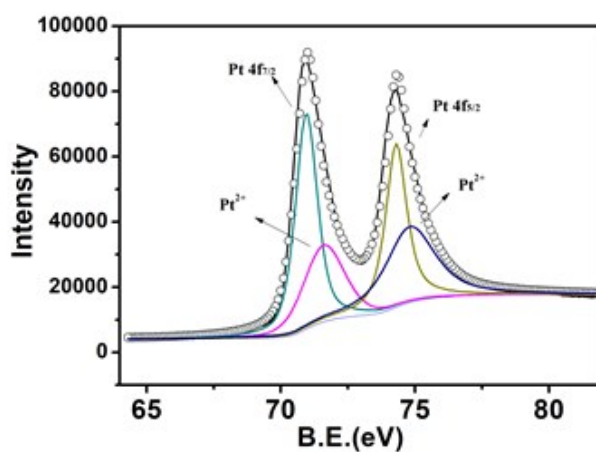

**Fig. S1** The XPS results of Pt in Au@PtRu nanorods.

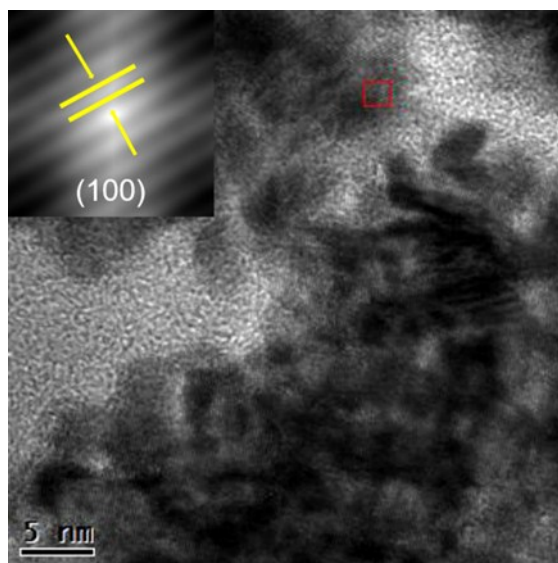

**Fig. S2** High-resolution transmission electron microscopy (HRTEM) image of Au@Pt nanorods.

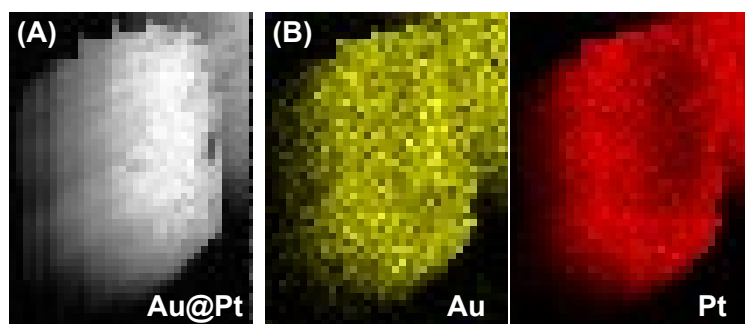

**Fig. S3** Scanning TEM (A) and elemental mapping patterns of Au@Pt nanorods (B).

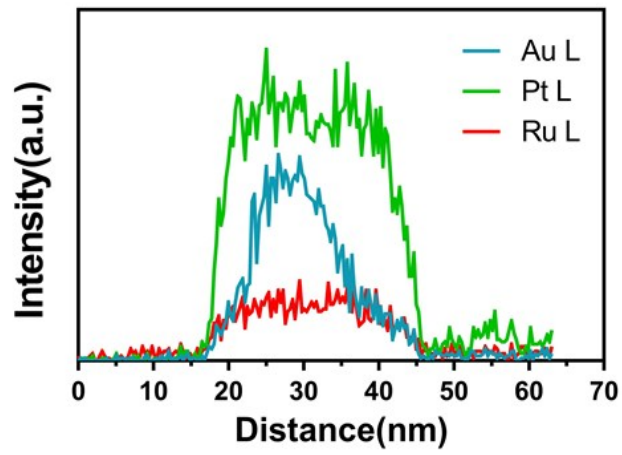

Fig. S4 The compositional line profiles of a single Au@PtRu nanorod.

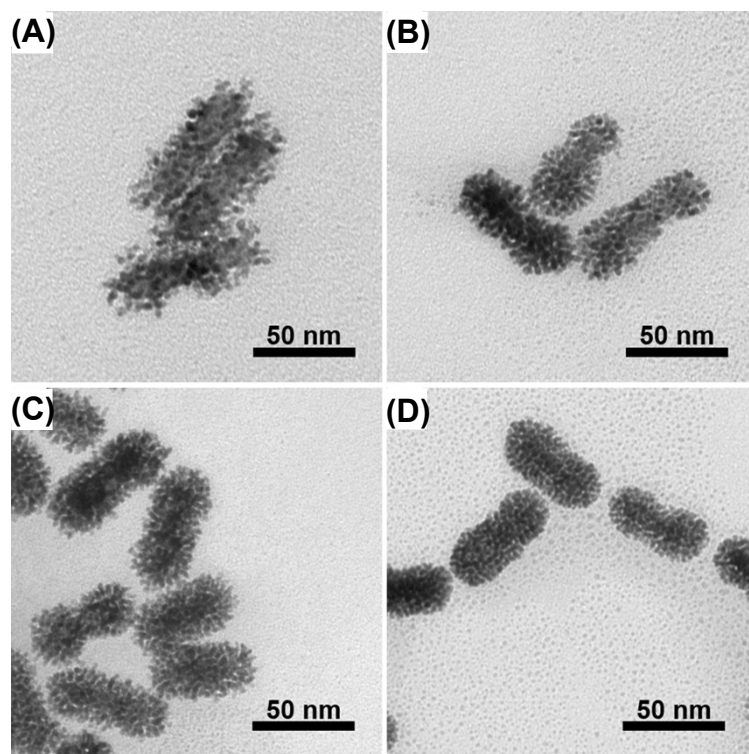

**Fig. S5** TEM images of the formation of Au@PtRu nanorods at different time points. (A) 30 min, (B) 60 min, (C) 90 min, (D) 120 min.

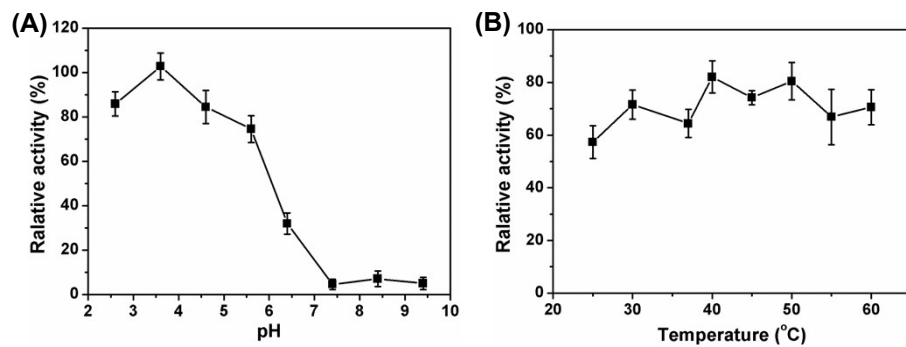

**Fig. S6** The effect of pH (A) and temperature (B) on the catalytic activity of Au@PtRu nanorods.

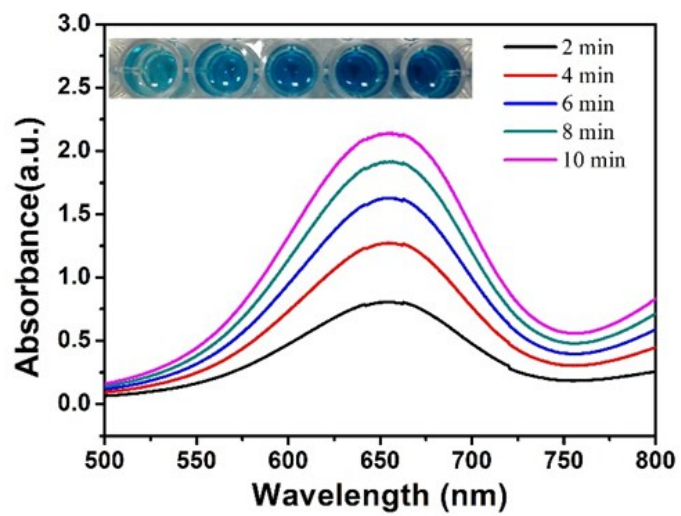

**Fig. S7** Time-dependent absorption spectra of TMB catalyzed by Au@PtRu nanorods.

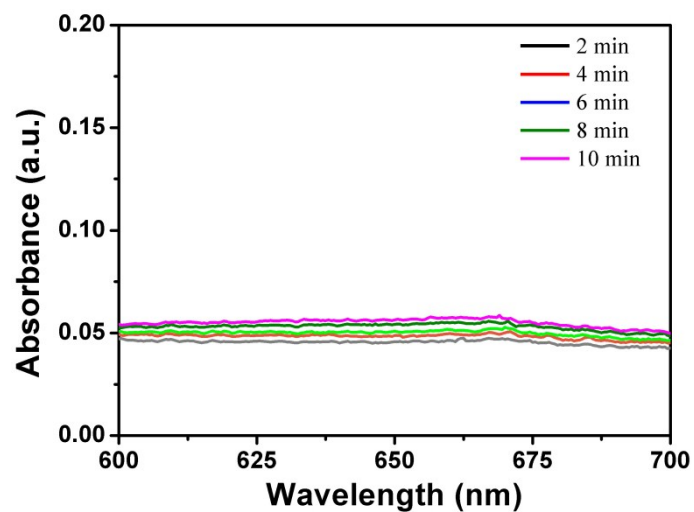

**Fig. S8** UV-vis spectra for detection of alcohol oxidase-like activity of Au@PtRu nanorods. The reaction was carried out in 800  $\mu\text{L}$  NaAc-HAc buffer solution (200 mM, pH 3.6), 50  $\mu\text{L}$  ethanol, 50  $\mu\text{L}$  Au@PtRu nanorods (20  $\mu\text{g}/\text{mL}$ ), and 50  $\mu\text{L}$  TMB (40 mM).



**Table S1** Comparison of the kinetic parameters of various catalysts toward the oxidation of TMB by H<sub>2</sub>O<sub>2</sub>.<sup>a</sup>

| Catalyst                                         | Substrate                     | $V_{\max}$ (M s <sup>-1</sup> ) | $K_m$ (M)            | $k_{\text{cat}}$ (s <sup>-1</sup> ) | $k_{\text{cat}}/K_m$ (s <sup>-1</sup> M <sup>-1</sup> ) | Refs         |
|--------------------------------------------------|-------------------------------|---------------------------------|----------------------|-------------------------------------|---------------------------------------------------------|--------------|
| <b>HRP</b>                                       | TMB                           | $1.0 \times 10^{-7}$            | $4.3 \times 10^{-4}$ | $4.0 \times 10^3$                   | $9.3 \times 10^6$                                       | S1           |
|                                                  | H <sub>2</sub> O <sub>2</sub> | $8.7 \times 10^{-8}$            | $3.7 \times 10^{-3}$ | $3.5 \times 10^3$                   | $9.5 \times 10^5$                                       |              |
| <b>Au@PtRu nanorods</b>                          | TMB                           | $1.3 \times 10^{-6}$            | $7.0 \times 10^{-4}$ | $3.4 \times 10^5$                   | $4.9 \times 10^8$                                       | Present work |
|                                                  | H <sub>2</sub> O <sub>2</sub> | $1.5 \times 10^{-6}$            | $2.3 \times 10^{-1}$ | $4.0 \times 10^5$                   | $1.7 \times 10^6$                                       |              |
| <b>Fe<sub>3</sub>O<sub>4</sub> nanoparticles</b> | TMB                           | $3.4 \times 10^{-8}$            | $9.8 \times 10^{-5}$ | $3.0 \times 10^4$                   | $3.0 \times 10^8$                                       | S1           |
|                                                  | H <sub>2</sub> O <sub>2</sub> | $9.8 \times 10^{-8}$            | $1.5 \times 10^{-1}$ | $8.6 \times 10^4$                   | $5.7 \times 10^5$                                       |              |
| <b>Graphene oxide nanosheets</b>                 | TMB                           | $3.5 \times 10^{-8}$            | $2.4 \times 10^{-5}$ | $2.9 \times 10^1$                   | $1.2 \times 10^6$                                       | S2           |
|                                                  | H <sub>2</sub> O <sub>2</sub> | $3.9 \times 10^{-8}$            | $4.0 \times 10^{-3}$ | $3.3 \times 10^1$                   | $8.2 \times 10^3$                                       |              |
| <b>Pt nanoparticles</b>                          | TMB                           | $1.3 \times 10^{-6}$            | $1.2 \times 10^{-4}$ | $2.3 \times 10^4$                   | $1.9 \times 10^8$                                       | S3           |
|                                                  | H <sub>2</sub> O <sub>2</sub> | $1.9 \times 10^{-6}$            | $7.7 \times 10^{-1}$ | $1.6 \times 10^4$                   | $2.1 \times 10^4$                                       |              |
| <b>Pd nanocubes</b>                              | TMB                           | $9.7 \times 10^{-8}$            | $5.4 \times 10^{-5}$ | $6.9 \times 10^4$                   | $1.2 \times 10^9$                                       | S4           |
|                                                  | H <sub>2</sub> O <sub>2</sub> | $6.5 \times 10^{-8}$            | $7.0 \times 10^{-1}$ | $4.6 \times 10^4$                   | $6.6 \times 10^4$                                       |              |
| <b>Ru nanoparticles</b>                          | TMB                           | $1.3 \times 10^{-7}$            | $6.0 \times 10^{-5}$ | $1.3 \times 10^4$                   | $2.2 \times 10^8$                                       | S5           |
|                                                  | H <sub>2</sub> O <sub>2</sub> | $7.4 \times 10^{-8}$            | $3.2 \times 10^{-1}$ | $7.0 \times 10^3$                   | $2.2 \times 10^4$                                       |              |
| <b>Fe<sub>2</sub>O<sub>3</sub> nanoplates</b>    | TMB                           | $3.9 \times 10^{-7}$            | $5.8 \times 10^{-4}$ | $2.1 \times 10^4$                   | $3.6 \times 10^7$                                       | S6           |
|                                                  | H <sub>2</sub> O <sub>2</sub> | $3.9 \times 10^{-6}$            | $4.5 \times 10^{-1}$ | $2.1 \times 10^5$                   | $4.7 \times 10^5$                                       |              |
| <b>Au/Fe<sub>3</sub>O<sub>4</sub> nanocubes</b>  | TMB                           | $5.9 \times 10^{-7}$            | $4.3 \times 10^{-5}$ | $7.1 \times 10^2$                   | $1.7 \times 10^7$                                       | S7           |
|                                                  | H <sub>2</sub> O <sub>2</sub> | $4.7 \times 10^{-7}$            | $1.4 \times 10^{-1}$ | $5.7 \times 10^2$                   | $4.1 \times 10^3$                                       |              |

<sup>a</sup> $K_m$  is the Michaelis constant,  $V_{\max}$  is the maximal reaction velocity,  $k_{\text{cat}}$  is the catalytic constant that equals  $V_{\max}/[E]$ , and  $k_{\text{cat}}/K_m$  is the catalytic efficiency.

## References:

1. L. Gao, J. Zhuang, L. Nie, J. Zhang, Y. Zhang, N. Gu, T. Wang, J. Feng, D. Yang, S. Perrett and X. Yan, *Nat Nanotechnol*, 2007, **2**, 577-583.
2. Y. Song, K. Qu, C. Zhao, J. Ren and X. Qu, *Adv Mater*, 2010, **22**, 2206-2210.
3. Z. Gao, M. Xu, L. Hou, G. Chen and D. Tang, *Anal Chim Acta*, 2013, **776**, 79-86.
4. X. Xia, J. Zhang, N. Lu, M. J. Kim, K. Ghale, Y. Xu, E. McKenzie, J. Liu and H. Ye, *ACS Nano*, 2015, **9**, 9994-10004.
5. H. Ye, J. Mohar, Q. Wang, M. Catalano, M. J. Kim and X. Xia, *Sci Bull*, 2016, **61**, 1739-1745.
6. M. Zhu, Y. Dai, Y. Wu, K. Liu, X. Qi and Y. Sun, *Nanotechnology*, 2018, **29**, 465704.
7. M. K. Masud, S. Yadav, M. N. Islam, N. T. Nguyen, C. Salomon, R. Kline, H. R. Alamri, Z. A. Alothman, Y. Yamauchi, M. S. A. Hossain and M. J. A. Shiddiky, *Anal Chem*, 2017, **89**, 11005-11013.
